# Supplementary material for: Detection of Self-Induced Vomiting in Eating Disorders Through Oral Microbiota Profiling
Source: Research Square preprint supplement (doi:10.21203/rs.3.rs-8046238/v1), 2025-11-18
Supplement: Supplementary file 1 [file 1e4dc727ab0512e09f98fae0.docx]

**Additional file 1**

**Psychopathological indexes in ED patients**

|  | **Yes (n/%)** | **Not (n/%)** |
| --- | --- | --- |
| **Smoking behaviour** | **9 (34.6%)** | **17 (65.4%)** |
| **Alcohol abuse/dependence** | **2 (8.3%)** | **22 (91.7%)** |
| **Drug abuse/dependence** | **8 (36.4%)** | **14 (63.6%)** |
| **Non-suicidal self-injurious behaviors** | **10 (41.7%)** | **14 (58.3%)** |
| **Suicide attempts** | **6 (25.0%)** | **18 (75.0%)** |
| **Suicidal ideation** | **16 (66.7%)** | **8 (33.3%)** |
